# Supplementary material
Source: PubMed Central journal article supplement (PMC7343629)
Supplement: NIHMS1598399-supplement-2.pdf [file NIHMS1598399-supplement-2.pdf]

# Jun and Ma *et al.* Figure S1. Related to Figure 1

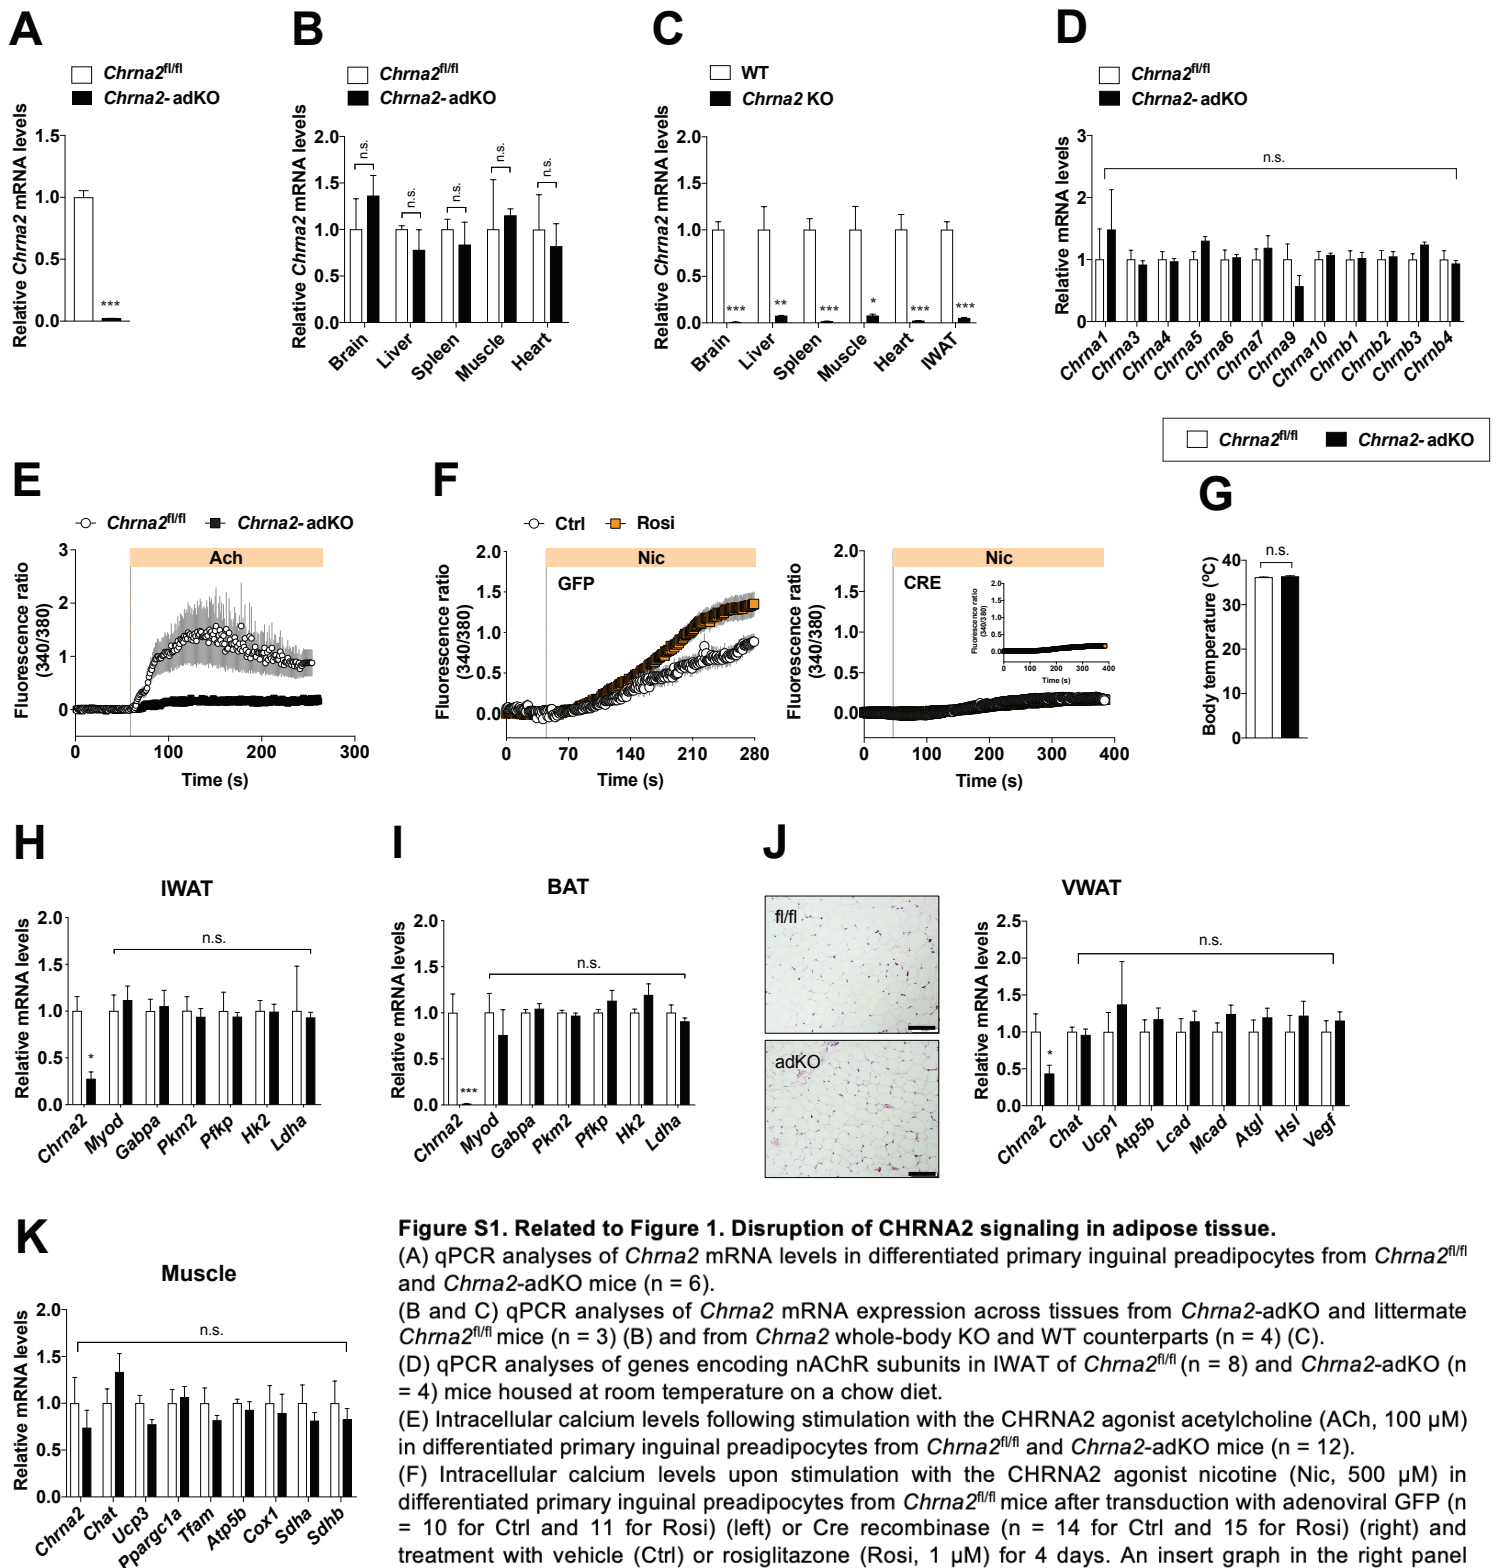

**Figure S1. Related to Figure 1. Disruption of CHRNA2 signaling in adipose tissue.**

(A) qPCR analyses of *Chrna2* mRNA levels in differentiated primary inguinal preadipocytes from *Chrna2*<sup>fl/fl</sup> and *Chrna2*-adKO mice (n = 6).

(B and C) qPCR analyses of *Chrna2* mRNA expression across tissues from *Chrna2*-adKO and littermate *Chrna2*<sup>fl/fl</sup> mice (n = 3) (B) and from *Chrna2* whole-body KO and WT counterparts (n = 4) (C).

(D) qPCR analyses of genes encoding nAChR subunits in IWAT of *Chrna2*<sup>fl/fl</sup> (n = 8) and *Chrna2*-adKO (n = 4) mice housed at room temperature on a chow diet.

(E) Intracellular calcium levels following stimulation with the CHRNA2 agonist acetylcholine (ACh, 100  $\mu$ M) in differentiated primary inguinal preadipocytes from *Chrna2*<sup>fl/fl</sup> and *Chrna2*-adKO mice (n = 12).

(F) Intracellular calcium levels upon stimulation with the CHRNA2 agonist nicotine (Nic, 500  $\mu$ M) in differentiated primary inguinal preadipocytes from *Chrna2*<sup>fl/fl</sup> mice after transduction with adenoviral GFP (n = 10 for Ctrl and 11 for Rosi) (left) or Cre recombinase (n = 14 for Ctrl and 15 for Rosi) (right) and treatment with vehicle (Ctrl) or rosiglitazone (Rosi, 1  $\mu$ M) for 4 days. An insert graph shows response with Rosi treatment in cells infected with adenoviral Cre separately, since it overlaps with the response with Ctrl treatment.

(G) Rectal core body temperature of *Chrna2*<sup>fl/fl</sup> (n = 14) and *Chrna2*-adKO (n = 6) mice at RT.

(H and I) qPCR analyses of glucose metabolism gene expression in IWAT (H) (n = 8 for fl/fl and 4 for adKO) and BAT (I) (n = 8 for fl/fl and 4 for adKO) from *Chrna2*<sup>fl/fl</sup> and *Chrna2*-adKO mice housed at room temperature.

(J) Representative H&E-stained images (left) and qPCR analyses (right) of VWAT (n = 9 for fl/fl and 13 for adKO) from *Chrna2*<sup>fl/fl</sup> and *Chrna2*-adKO mice under the basal condition. Scale bar, 100  $\mu$ m.

(K) qPCR analyses of shivering-related gene expression in the skeletal muscle of *Chrna2*<sup>fl/fl</sup> (n = 4) and *Chrna2*-adKO (n = 6) mice under the basal condition.

Data are presented as mean  $\pm$  SEM. \*p < 0.05, \*\*p < 0.01 and \*\*\*p < 0.005 by an unpaired two sample Student's *t*-test for two-group comparisons. n.s., not significant (p > 0.1).

**Jun and Ma *et al.***  
**Figure S2. Related to Figure 2**

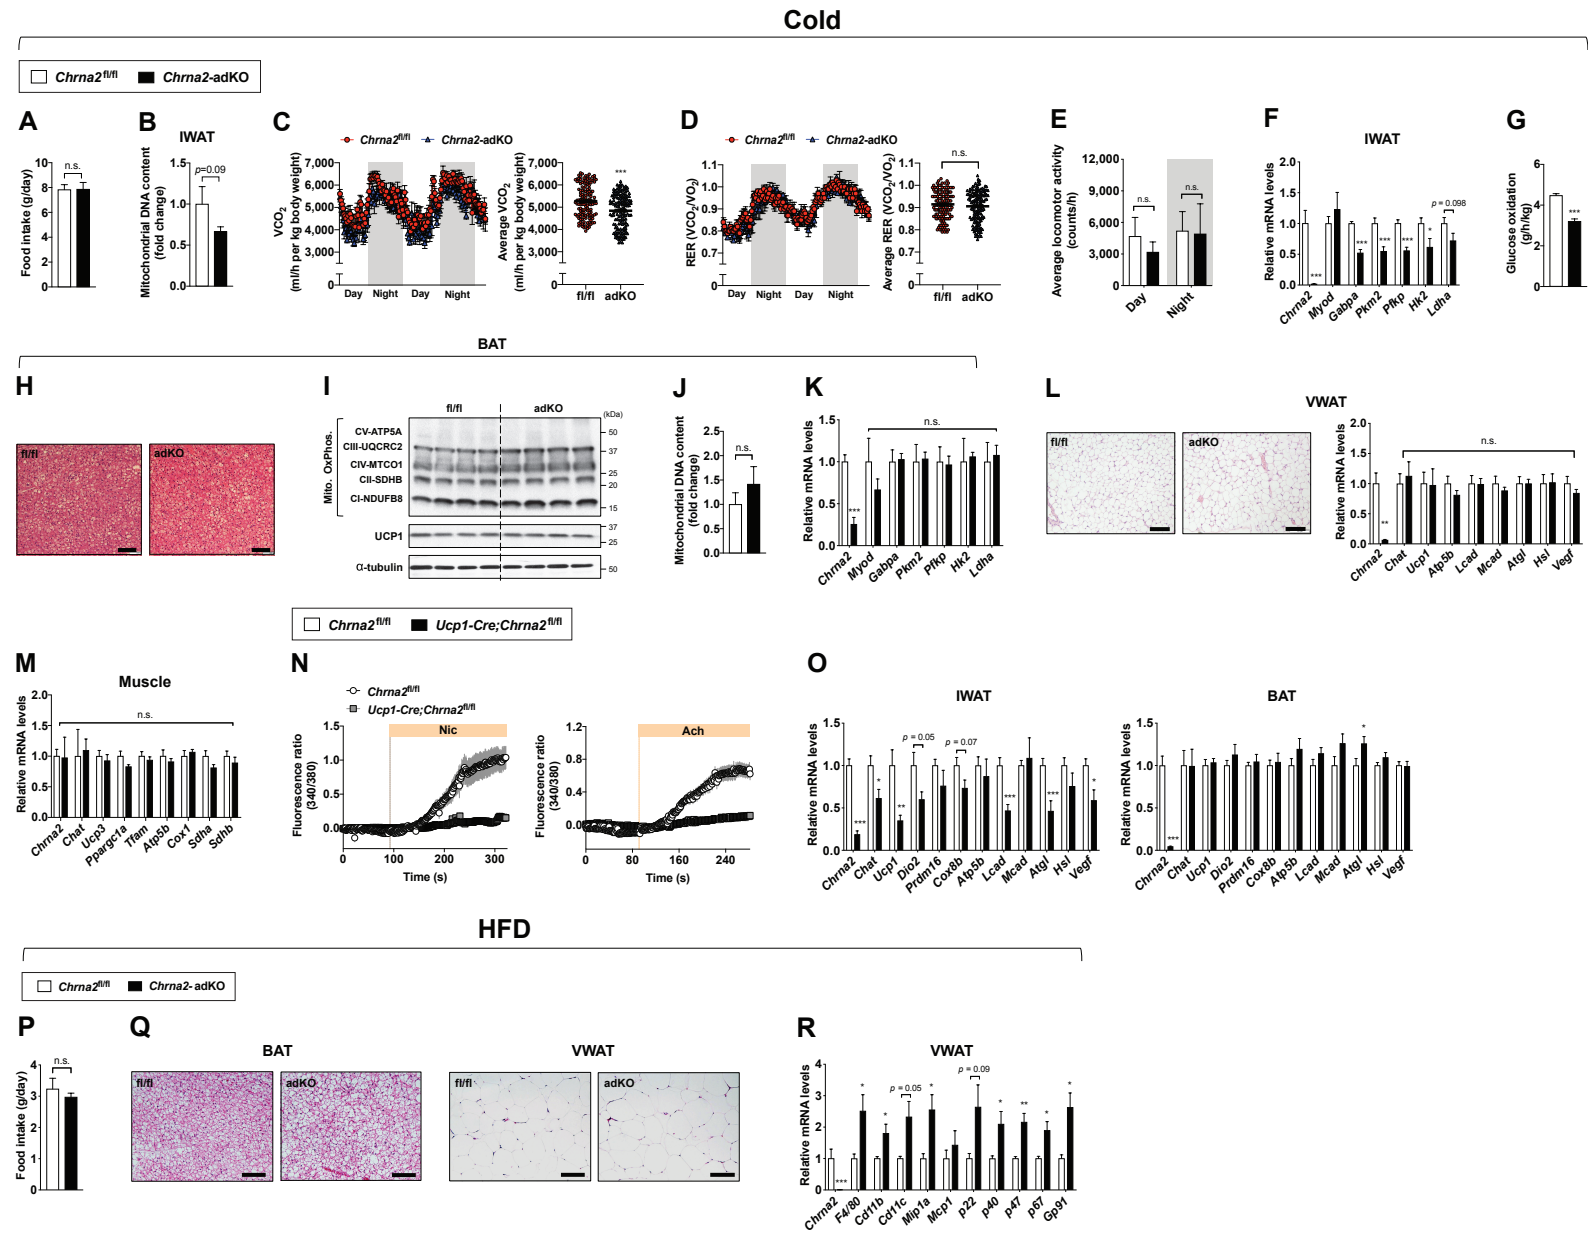

**Figure S2. Related to Figure 2. Inguinal thermogenic defects by adipose-specific *Chrna2* deletion.**

(A) Daily food intake on a chow diet in *Chrna2<sup>fl/fl</sup>* (n = 19) and *Chrna2-adKO* (n = 17) mice upon cold exposure (CE).  
 (B) Mitochondrial DNA content in IWAT of *Chrna2<sup>fl/fl</sup>* (n = 12) and *Chrna2-adKO* (n = 14) mice following CE.  
 (C) Whole-body  $\text{CO}_2$  production ( $\text{VCO}_2$ ) (left) and averaged  $\text{VCO}_2$  (right) of *Chrna2<sup>fl/fl</sup>* (n = 7) and *Chrna2-adKO* (n = 5) mice after CE.  
 (D) Whole-body respiratory exchange ratio (RER) and averaged RER of *Chrna2<sup>fl/fl</sup>* (n = 7) and *Chrna2-adKO* (n = 5) mice after CE.  
 (E) Total locomotor activity (at x-axis and y-axis) of *Chrna2<sup>fl/fl</sup>* (n = 7) and *Chrna2-adKO* (n = 5) mice upon CE.  
 (F) qPCR analyses of glucose metabolism gene expression in IWAT of *Chrna2<sup>fl/fl</sup>* (n = 9) and *Chrna2-adKO* (n = 11) mice after CE.  
 (G) Whole-body glucose oxidation of *Chrna2<sup>fl/fl</sup>* and *Chrna2-adKO* mice after CE (n = 6).  
 (H) Representative H&E-stained images of BAT from *Chrna2<sup>fl/fl</sup>* and *Chrna2-adKO* mice after CE. Scale bar, 100  $\mu\text{m}$ .  
 (I) Immunoblot analyses of UCP1 and mitochondrial OxPhos components in BAT from *Chrna2<sup>fl/fl</sup>* and *Chrna2-adKO* mice after CE (n = 4).  $\alpha$ -tubulin served as a loading control.  
 (J) Mitochondrial DNA content in BAT of *Chrna2<sup>fl/fl</sup>* (n = 12) and *Chrna2-adKO* (n = 14) mice following CE.  
 (K) qPCR analyses of glucose metabolism gene expression in BAT of *Chrna2<sup>fl/fl</sup>* and *Chrna2-adKO* mice after CE (n = 12).  
 (L) Representative H&E-stained images (left) and qPCR analyses of thermogenic gene expression (n = 10) (right) of VWAT from *Chrna2<sup>fl/fl</sup>* and *Chrna2-adKO* mice after CE. Scale bar, 100  $\mu\text{m}$ .  
 (M) qPCR analyses of shivering-related gene expression in the skeletal muscle of *Chrna2<sup>fl/fl</sup>* (n = 8) and *Chrna2-adKO* (n = 6) mice after CE.  
 (N) The absence of calcium uptake in response to the CHRNA2 agonist nicotine (Nic, 500  $\mu\text{M}$ ) (n = 12 for fl/fl and 20 for Cre) (left) or acetylcholine (Ach, 100  $\mu\text{M}$ ) (n = 15 for fl/fl and 22 for Cre) (right) in differentiated primary inguinal preadipocytes from *Ucp1-Cre; Chrna2<sup>fl/fl</sup>* mice compared to the control cells from *Chrna2<sup>fl/fl</sup>* mice.  
 (O) qPCR analyses of thermogenic markers of IWAT (left) and BAT (right) from *Chrna2<sup>fl/fl</sup>* (n = 10) and *Ucp1-Cre; Chrna2<sup>fl/fl</sup>* (n = 8) mice exposed to cold (10°C) for 2 weeks.  
 (P) Daily food intake on a HFD in *Chrna2<sup>fl/fl</sup>* (n = 10) and *Chrna2-adKO* (n = 16) mice.  
 (Q) Representative H&E-stained images of BAT (left) and VWAT (right) from *Chrna2<sup>fl/fl</sup>* and *Chrna2-adKO* mice after HFD feeding. Scale bar, 100  $\mu\text{m}$ .  
 (R) qPCR analyses of macrophage-related inflammatory and NADPH oxidase-related oxidative stress gene expression in VWAT of *Chrna2<sup>fl/fl</sup>* (n = 5) and *Chrna2-adKO* (n = 7) mice following HFD challenge.  
 Data are presented as mean  $\pm$  SEM. \*p < 0.05, \*\*p < 0.01 and \*\*\*p < 0.005 by an unpaired two sample Student's *t*-test for two-group comparisons. n.s., not significant (p > 0.1).

**Jun and Ma *et al.***  
**Figure S3. Related to Figure 3**

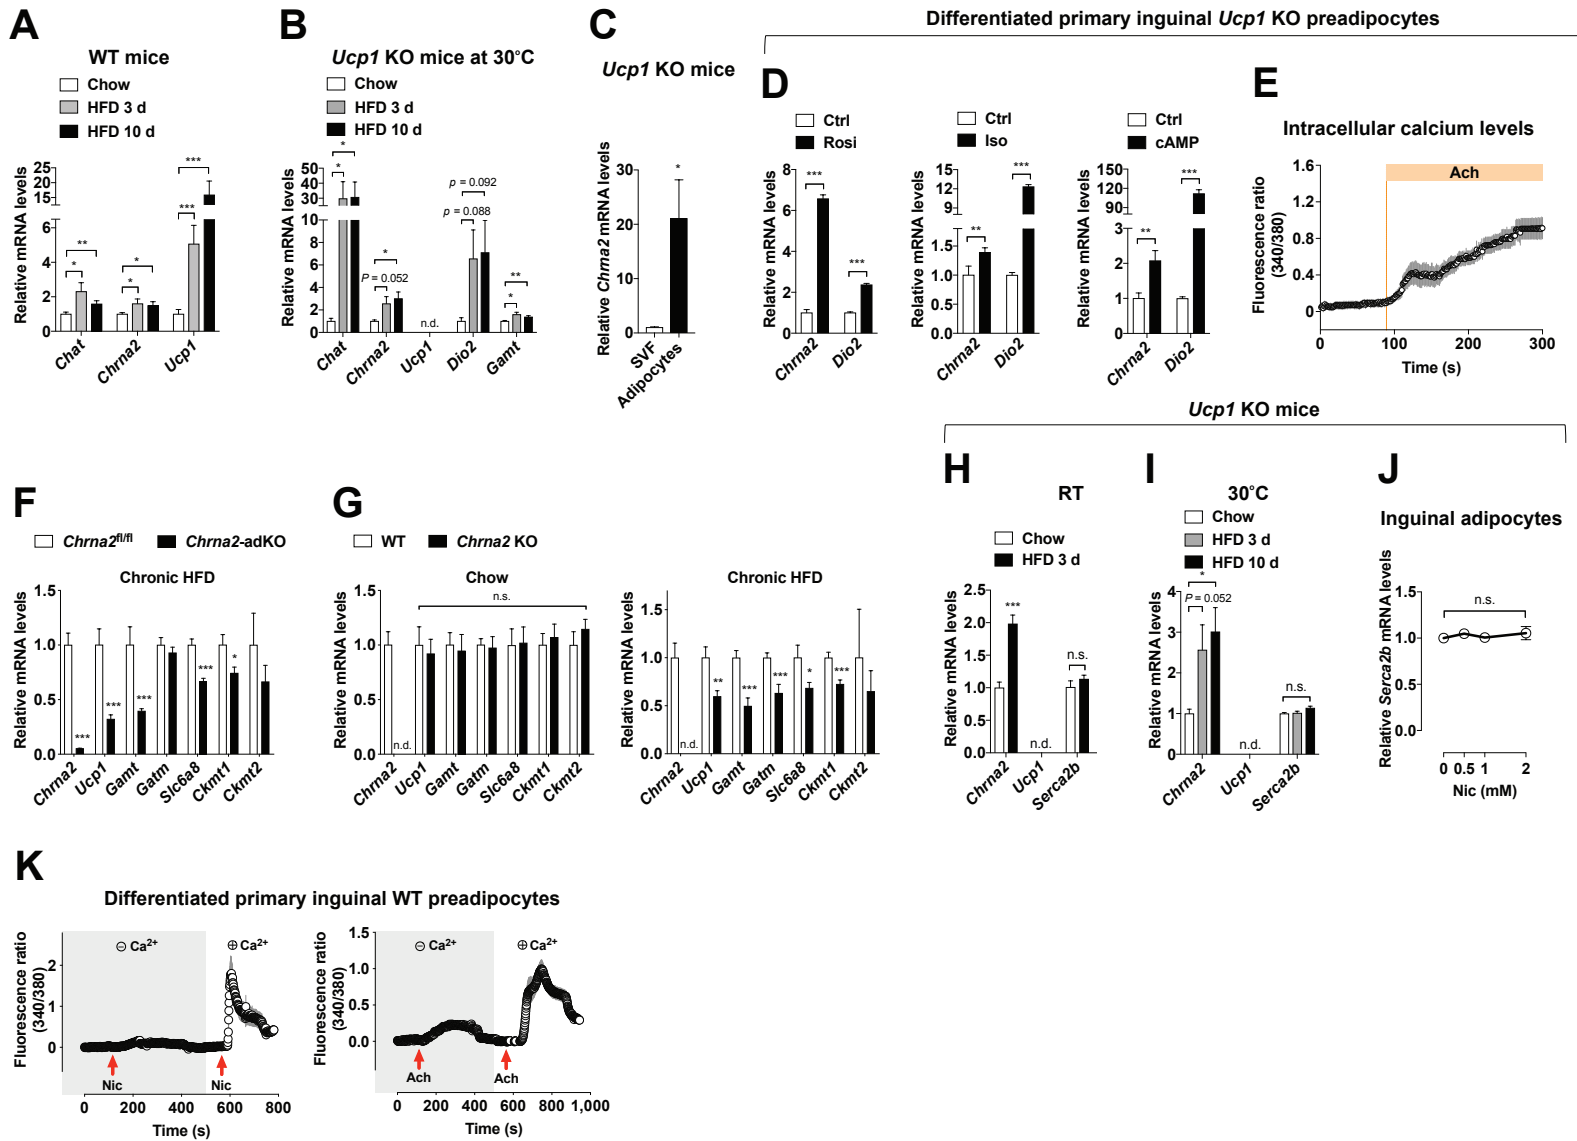

**Figure S3. Related to Figure 3. Activation of CHRNA2 signaling in IWAT of *Ucp1* KO mice during calorie overload.**

(A) qPCR analyses of *Chat*, *Chrna2* and *Ucp1* mRNA levels in IWAT of WT mice fed chow diet (n = 21) or HFD for 3 days (n = 20) or 10 days (n = 21) at room temperature (RT).

(B) qPCR analyses of *Chat*, *Chrna2* and representative thermogenic (*Dio2*) and creatine metabolism (*Gamt*) markers in the IWAT of *Ucp1* KO mice fed chow diet (n = 6) or HFD (n = 8) for 3 days or 10 days (n = 8) at thermoneutrality (30°C).

(C) qPCR analyses of *Chrna2* mRNA levels in the SVF and mature adipocytes of IWAT from *Ucp1* KO mice housed at room temperature on a chow diet (n = 4).

(D) qPCR analyses of *Chrna2* and *Dio2* mRNA levels in differentiated primary inguinal preadipocytes from *Ucp1* KO mice after treatment with vehicle (Ctrl), 1 μM rosiglitazone (Rosi) for 2 days, 10 μM isoproterenol (Iso) for 4 hours or 500 μM dibutyryl-cAMP (cAMP) for 4 hours (n = 6).

(E) Increased intracellular calcium levels in the presence of the CHRNA2 agonist acetylcholine (Ach, 100 μM) in differentiated *Ucp1* KO inguinal preadipocytes (n = 11).

(F) qPCR analyses of *Chrna2*, *Ucp1* and creatine metabolism gene expression in IWAT of *Chrna2*<sup>fl/fl</sup> (n = 5) and *Chrna2*-adKO (n = 7) mice after 11 weeks on a HFD (45% of calories from fat) at RT.

(G) qPCR analyses of *Chrna2*, *Ucp1* and creatine metabolism gene expression in IWAT of WT control and *Chrna2* KO mice after 10 weeks on a chow diet (left) or HFD (right) at RT (n = 9).

(H) qPCR analyses of *Chrna2*, *Ucp1* and calcium cycling marker *Serca2b* mRNA levels in IWAT of *Ucp1* KO mice fed chow diet or HFD for 3 days at RT (n = 12).

(I) qPCR analyses of *Chrna2*, *Ucp1* and *Serca2b* in IWAT of *Ucp1* KO mice fed chow diet (n = 6) or HFD for 3 days (n = 8) or 10 days (n = 8) at thermoneutrality (30°C).

(J) qPCR analyses of *Serca2b* mRNA levels in differentiated primary inguinal preadipocytes from *Ucp1* KO mice after treatment with vehicle (Ctrl) (n = 8) or the indicated concentration of nicotine (Nic) (n = 9) for 6 hours.

(K) The absence of calcium uptake under Ca<sup>2+</sup>-free condition (medium containing EGTA) in differentiated WT inguinal adipocytes stimulated with the CHRNA2 agonist Nic (500 μM) (n = 15) or Ach (100 μM) (n = 16).

Data are presented as mean ± SEM. \**p* < 0.05, \*\**p* < 0.01 and \*\*\**p* < 0.005 by an unpaired two sample Student's *t*-test for two-group comparisons. n.s., not significant (*p* > 0.1). n.d., not detected.

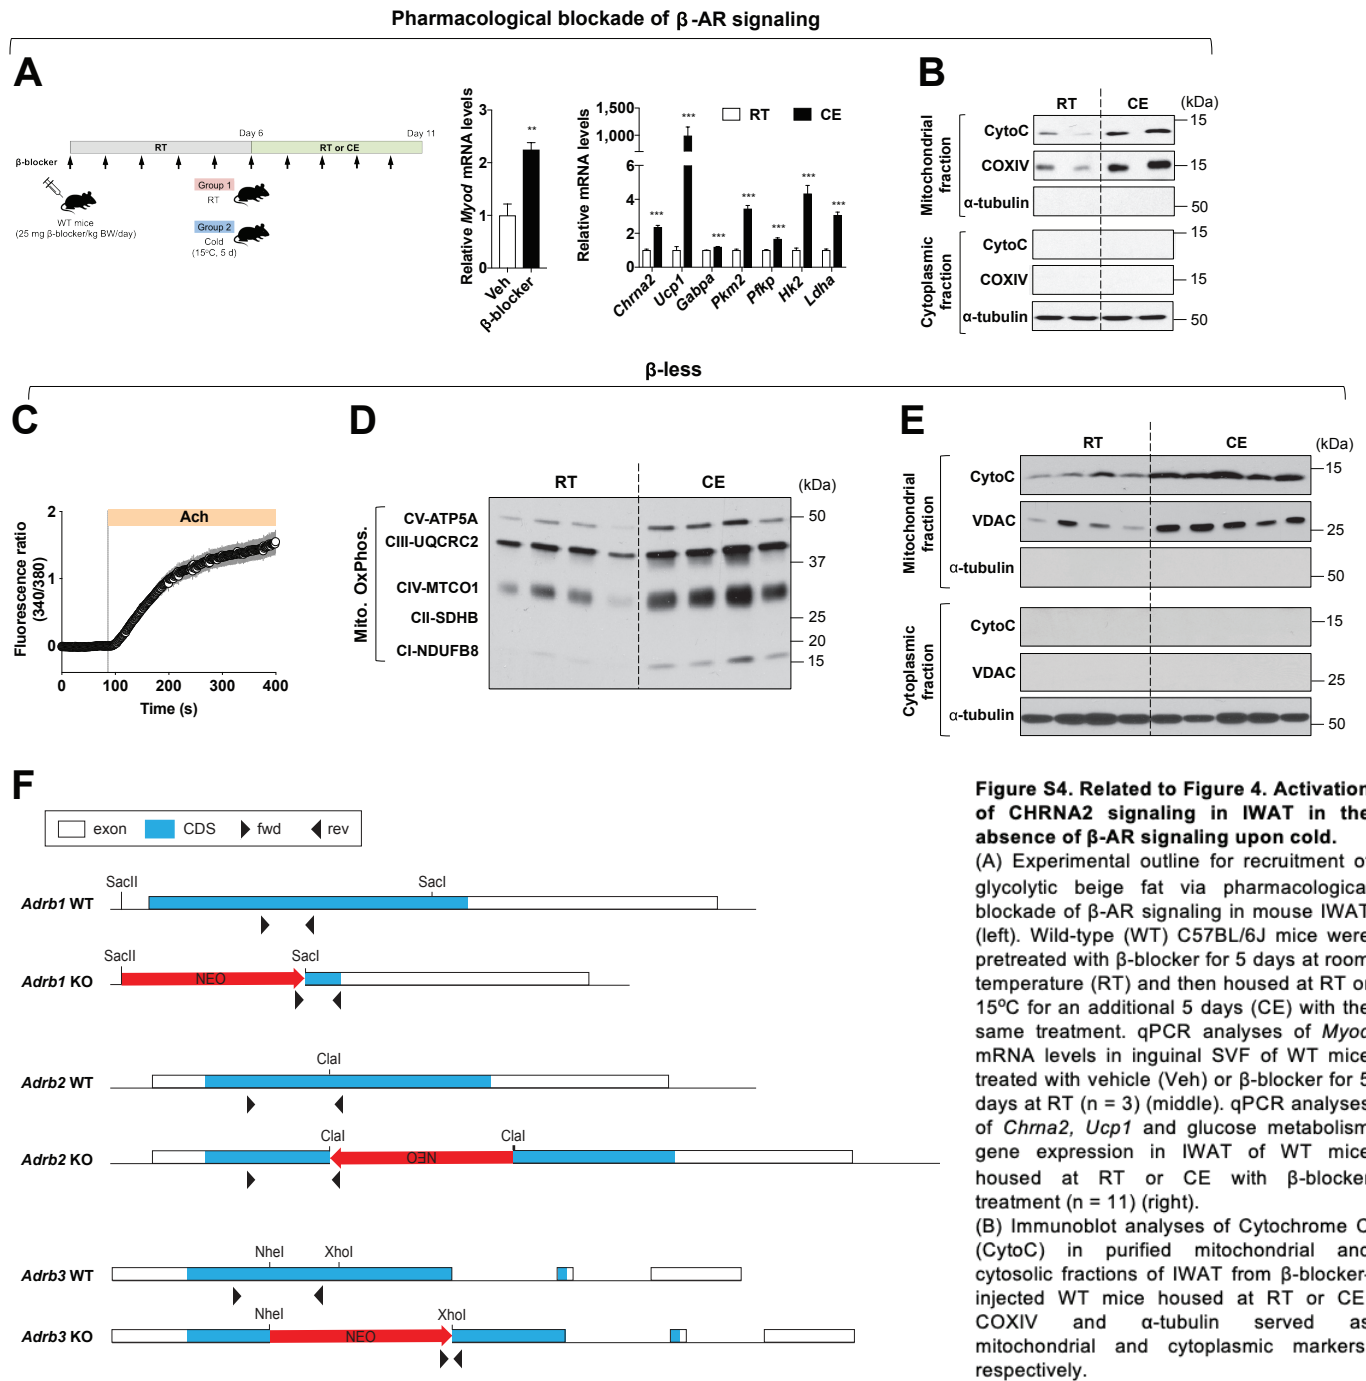

**Figure S4. Related to Figure 4. Activation of CHRNA2 signaling in IWAT in the absence of  $\beta$ -AR signaling upon cold.**

(A) Experimental outline for recruitment of glycolytic beige fat via pharmacological blockade of  $\beta$ -AR signaling in mouse IWAT (left). Wild-type (WT) C57BL/6J mice were pretreated with  $\beta$ -blocker for 5 days at room temperature (RT) and then housed at RT or 15°C for an additional 5 days (CE) with the same treatment. qPCR analyses of *Myod* mRNA levels in inguinal SVF of WT mice treated with vehicle (Veh) or  $\beta$ -blocker for 5 days at RT ( $n = 3$ ) (middle). qPCR analyses of *Chrna2*, *Ucp1* and glucose metabolism gene expression in IWAT of WT mice housed at RT or CE with  $\beta$ -blocker treatment ( $n = 11$ ) (right).

(B) Immunoblot analyses of Cytochrome C (CytoC) in purified mitochondrial and cytosolic fractions of IWAT from  $\beta$ -blocker-injected WT mice housed at RT or CE. COXIV and  $\alpha$ -tubulin served as mitochondrial and cytoplasmic markers, respectively.

(C) Upregulation of intracellular calcium levels in response to the CHRNA2 agonist acetylcholine (ACh, 100  $\mu$ M) in differentiated primary inguinal preadipocytes from  $\beta$ -less ( $n = 24$ ), indicating the presence and activation of CHRNA2 signaling in  $\beta$ -ARs-deleted adipocytes.

(D) Immunoblot analyses of mitochondrial OxPhos components of IWAT from  $\beta$ -less mice at RT or CE.

(E) Immunoblot analyses of CytoC in purified mitochondrial and cytosolic fractions of IWAT from  $\beta$ -less mice at RT or CE. VDAC and  $\alpha$ -tubulin served as mitochondrial and cytoplasmic markers, respectively.

(F) Generation of  $\beta$ 1WT and  $\beta$ 3WT mice.  $\beta$ 1WT and  $\beta$ 3WT mice were generated by crossing  $\beta$ -less mice and 129SVE mice.  $\beta$ 1WT mice expressed *Adrb1*, but not *Adrb2* and *Adrb3*. *Adrb1* and *Adrb2* were knocked-out in  $\beta$ 3WT mice. Primers to detect WT or knockout (KO) alleles in *Adrb1*, *Adrb2* and *Adrb3* were developed based on the gene targeting strategy described previously (Chruscinski *et al.*, 1999; Rohrer *et al.*, 1996; Susulic *et al.*, 1995). *Adrb1* WT primers were targeted to the region between *SacII* and *SacI* cut sites within the *Adrb1* transcript. *Adrb1* KO primers combined a forward primer targeted to the Neo cassette with a reverse primer at the end of the *Adrb1* coding sequence (Rohrer *et al.*, 1996). Primers to detect the *Adrb2* WT and KO were developed based on the targeting construct described in Chruscinski *et al.* *Adrb2* WT primers were targeted to the *Adrb2* transcript, specifically surrounding the *ClaI* cut site. *Adrb2* KO primers combined a forward primer before the *ClaI* cut site with a forward primer within the Neo cassette (the Neo cassette is reversed in these animals). Based on the targeting strategy for deletion of *Adrb3* (Susulic *et al.*, 1995), *Adrb3* WT primers were targeted to the region around the *NheI* cut site within the *Adrb3* transcript. *Adrb3* KO primers combined a forward primer targeted to the Neo cassette with a reverse primer after the *XhoI* cut site in the *Adrb3* sequence.

Data are presented as mean  $\pm$  SEM. \*\* $p < 0.01$ , and \*\*\* $p < 0.005$  by an unpaired two sample Student's *t*-test for two-group comparisons.

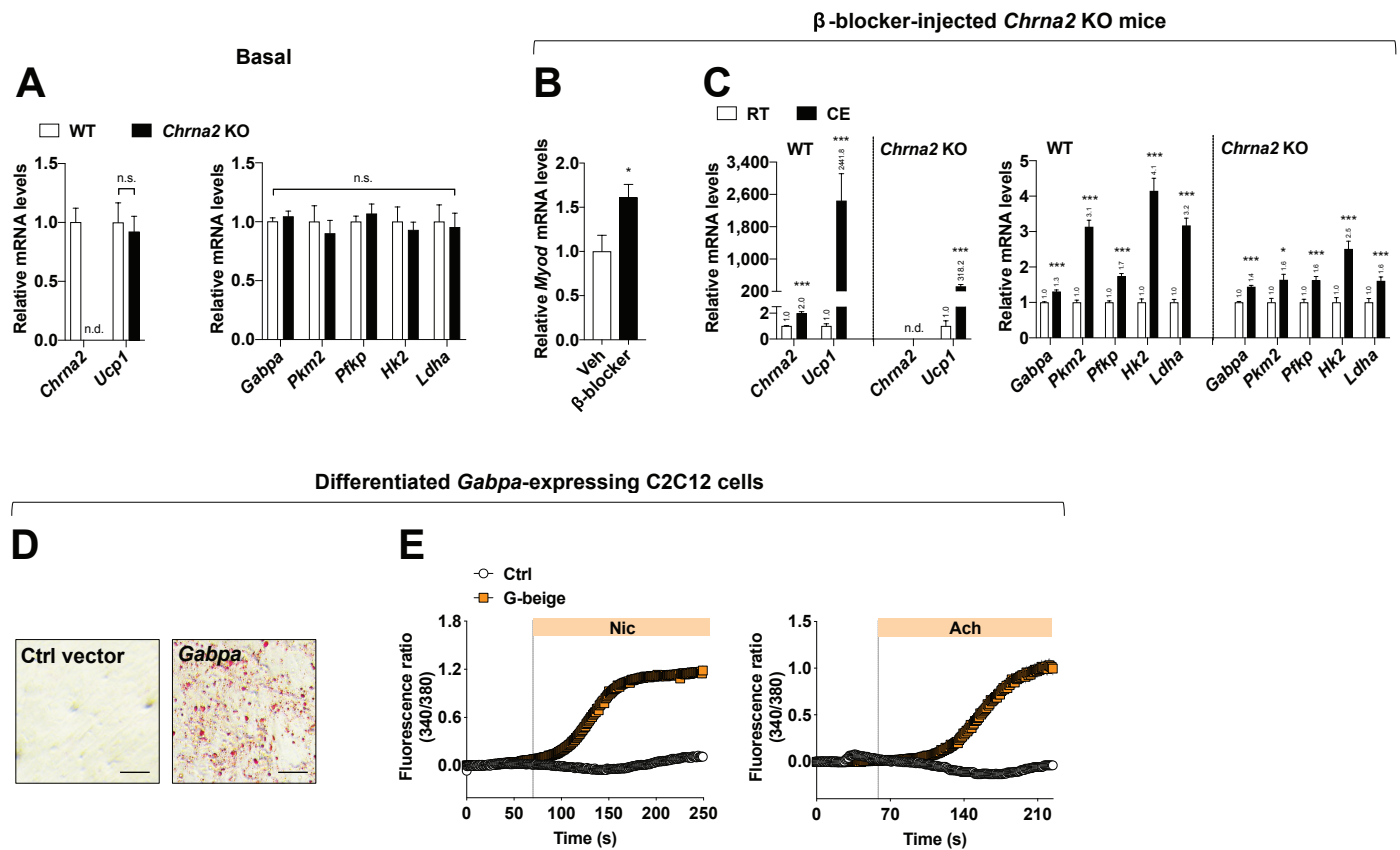

**Figure S5. Related to Figure 5. The role of CHRNA2 in glycolytic beige fat recruitment.**

(A) qPCR analyses of *Chrna2*, *Ucp1* (left) and glucose metabolism gene (right) expression in IWAT of WT control ( $n = 8$ ) and *Chrna2* KO ( $n = 9$ ) mice housed at room temperature (RT) on a chow diet.

(B) qPCR analyses of *Myod* mRNA levels in inguinal stromal vascular fraction (SVF) of *Chrna2* KO mice injected with vehicle or  $\beta$ -blocker for 5 days ( $n = 5$ ).

(C) qPCR analyses of *Chrna2*, *Ucp1* (left) and glucose metabolism gene (right) expression in IWAT of WT ( $n = 19$  for RT and 18 for CE) and *Chrna2* KO ( $n = 9$ ) mice housed at RT or 15°C for 5 days (CE) with  $\beta$ -blocker treatment.

(D) Oil Red O staining in differentiated C2C12 cells expressing control vector or *Gabpa* under pro-adipogenic conditions. Scale bar, 50  $\mu\text{m}$ .

(E) Increased intracellular calcium levels in the presence of the CHRNA2 agonist nicotine (Nic, 500  $\mu\text{M}$ ) ( $n = 15$  for Ctrl and 22 for *Gabpa*) (left) or acetylcholine (ACh, 100  $\mu\text{M}$ ) ( $n = 11$  for Ctrl and 30 for *Gabpa*) (right) in differentiated C2C12 cells expressing control vector or *Gabpa*, indicating the presence and activation of CHRNA2 signaling in g-beige adipocytes.

Data are presented as mean  $\pm$  SEM. \* $p < 0.05$ , and \*\*\* $p < 0.005$  by an unpaired two sample Student's *t*-test for two-group comparisons. n.s., not significant ( $p > 0.1$ ). n.d., not detected.
